# Supplementary material for: Gamma Knife Radiosurgery for Pituitary Tumors: A Systematic Review and Meta-Analysis
Source: MDPI journal article supplement (doi:10.3390/cancers13194998), 2021-10-05
Supplement: s1 [file s1]

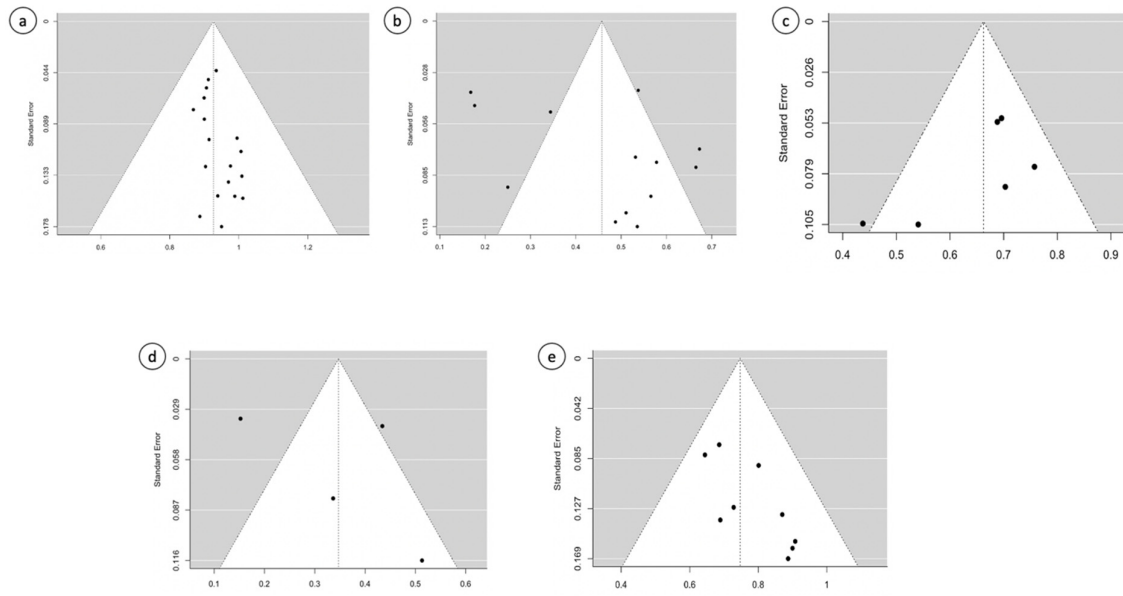

**Figure S1.** Funnel plots for tumor control/tumor remission with observed proportion outcome on x-axis and standard error on the y-axis. Tumor control for non-functioning pituitary adenomas **(a)**; tumor remission for growth-hormone pituitary adenomas **(b)**, adrenocorticotrophic hormone-secreting pituitary adenomas **(c)** and prolactin hormone-secreting pituitary adenomas **(d)**; tumor control for craniopharyngiomas **(e)**.

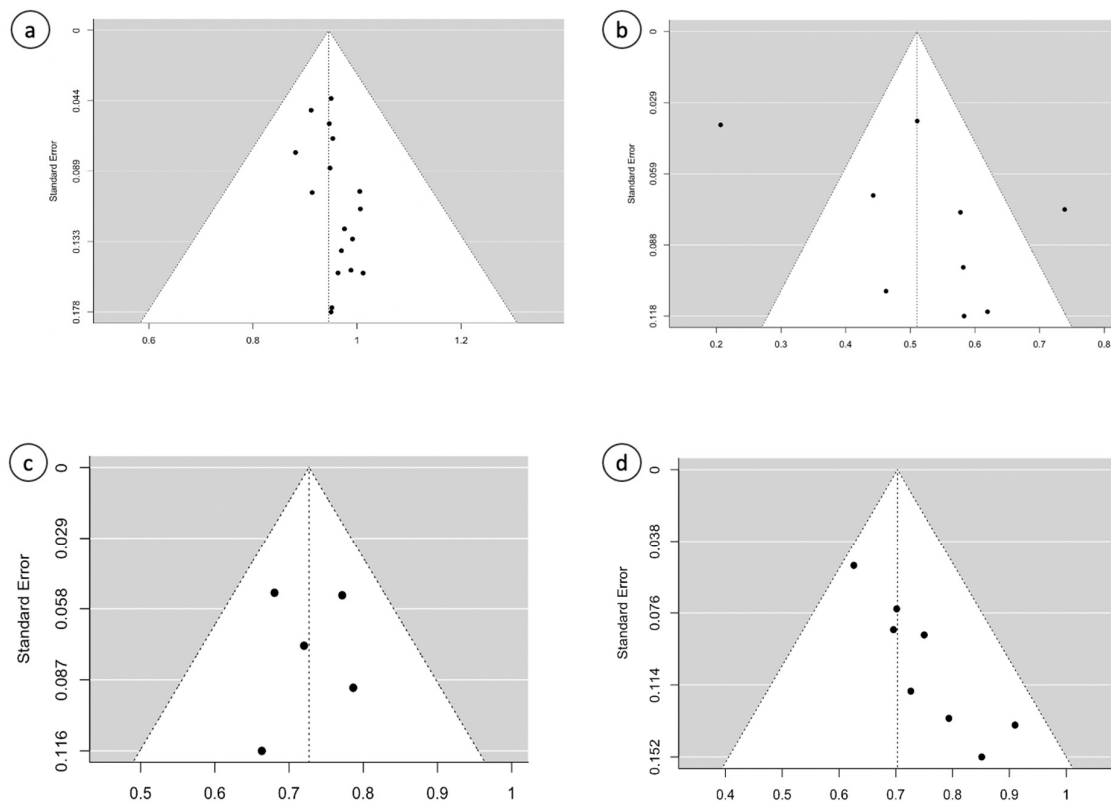

**Figure S2.** Funnel plots for 5-year progression free survival with observed proportion on x-axis and standard error on the y-axis. 5-year progression free survival for non-functioning pituitary adenomas (a), for growth-hormone pituitary adenomas (b), adrenocorticotrophic hormone-secreting pituitary adenomas (c) and for craniopharyngiomas (d).

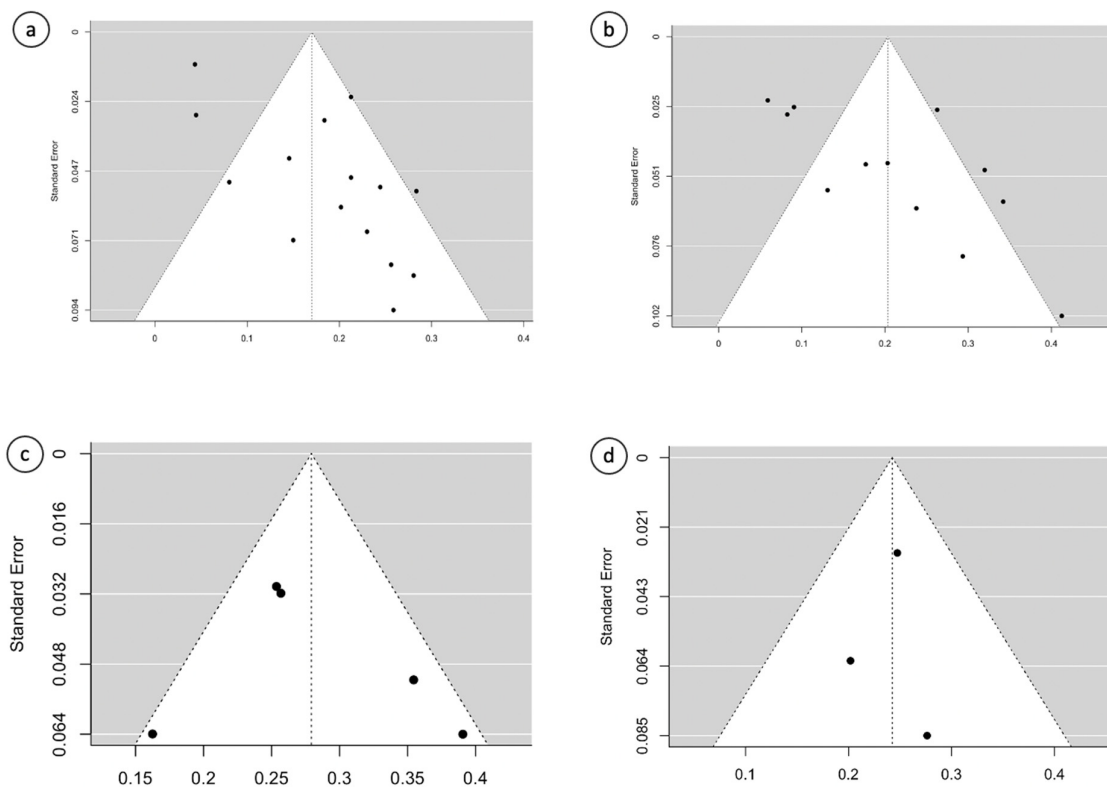

**Figure S3.** Funnel plots for hypopituitarism with observed proportion on x-axis and standard error on the y-axis. New onset hypopituitarism for non-functioning pituitary adenomas **(a)**, for growth-hormone pituitary adenomas **(b)**, adrenocorticotrophic hormone-secreting pituitary adenomas **(c)** and for prolactinomas **(d)**.

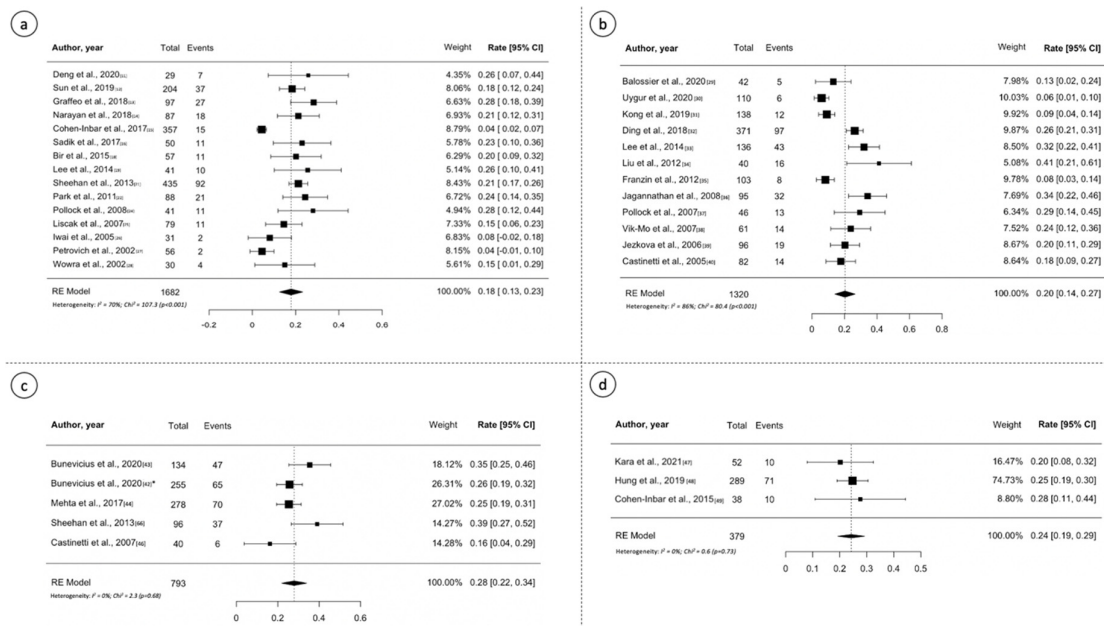

**Figure S4.** Forest plots of new onset hypopituitarism following Gamma Knife treatment for non-functioning pituitary adenomas **(a)**, growth-hormone pituitary adenomas **(b)**, and adrenocorticotrophic hormone-secreting pituitary adenomas **(c)** and prolactin hormone-secreting pituitary adenomas **(d)**.
